# Supplementary material
Source: PubMed Central journal article supplement (PMC5070610)
Supplement: NIHMS800446-supplement-3.pdf [file NIHMS800446-supplement-3.pdf]

**Supplementary Table 1. Antibody summary.**

| Target                  | Vendor <sup>a</sup> | Catalog #  | Host species <sup>b</sup> | Clon-ality <sup>c</sup> | Target size | PFA | MAP |
|-------------------------|---------------------|------------|---------------------------|-------------------------|-------------|-----|-----|
| Cell type markers       |                     |            |                           |                         |             |     |     |
| Calbindin               | Abcam               | ab11426    | Rb                        | P                       | Protein     | O   | O   |
| Calbindin               | CST                 | 13176      | Rb                        | M                       | Protein     | O   | O   |
| Calbindin               | Abcam               | ab82812    | Ms                        | M                       | Protein     | O   | X   |
| Calretinin              | Abcam               | ab702      | Rb                        | P                       | Protein     | O   | O   |
| Calretinin              | Abcam               | ab133316   | Rb                        | M                       | Protein     | O   | X   |
| CaMKIIa                 | Abcam               | ab22609    | Ms                        | M                       | Protein     | O   | O   |
| ChAT                    | Aves                | CAT        | Ch                        | P                       | Protein     | O   | O   |
| GAD2                    | CST                 | 5843       | Rb                        | M                       | Protein     | O   | O   |
| GAD65/2                 | BioLegend           | 844502     | Ms                        | M                       | Protein     | O   | O   |
| GAD65/2                 | BioLegend           | 844503     | Ms                        | M                       | Protein     | O   | O   |
| GAD65/67                | Millipore           | AB1511     | Ms                        | P                       | Protein     | O   | O   |
| GAD67                   | Millipore           | MAB5406    | Ms                        | M                       | Protein     | O   | O   |
| GFAP                    | Abcam               | ab48050    | Rb                        | P                       | Protein     | O   | O   |
| GFAP                    | Aves                | GFAP       | Ch                        | P                       | Protein     | O   | O   |
| GFAP                    | BioLegend           | 835301     | Ms                        | M                       | Protein     | O   | O   |
| GFAP                    | BioLegend           | 837201     | Ms                        | M                       | Protein     | O   | O   |
| GFAP, A488 <sup>d</sup> | CST                 | 3655       | Ms                        | M                       | Protein     | O   | O   |
| GFAP, A594 <sup>e</sup> | CST                 | 8152       | Ms                        | M                       | Protein     | O   | O   |
| Iba1                    | Abcam               | ab107159   | Gt                        | P                       | Protein     | O   | X   |
| Iba1                    | Abcam               | ab5076     | Gt                        | P                       | Protein     | O   | X   |
| Iba1                    | Novus               | NB100-1028 | Gt                        | P                       | Protein     | O   | X   |
| Iba1                    | Wako                | 019-19741  | Rb                        | P                       | Protein     | O   | O   |
| NeuN                    | Abcam               | ab104225   | Rb                        | P                       | Protein     | O   | O   |
| NeuN                    | Abcam               | ab177487   | Rb                        | M                       | Protein     | O   | O   |
| NeuN                    | BioLegend           | 834501     | Ms                        | M                       | Protein     | O   | O   |
| NeuN                    | CST                 | 12943      | Rb                        | M                       | Protein     | O   | O   |
| NeuN                    | CST                 | 24307      | Rb                        | M                       | Protein     | O   | O   |
| NeuN                    | Millipore           | MAB377     | Ms                        | M                       | Protein     | O   | O   |
| Parvalbumin             | Abcam               | ab11427    | Rb                        | P                       | Protein     | O   | O   |
| Parvalbumin             | Abcam               | ab32895    | Gt                        | P                       | Protein     | O   | O   |
| Somatostatin            | Millipore           | MAB354     | Rt                        | M                       | Protein     | O   | O   |
| Tau                     | Aves                | TAU        | Ch                        | P                       | Protein     | X   | O   |

|                       |           |          |    |   |         |   |   |
|-----------------------|-----------|----------|----|---|---------|---|---|
| TH                    | Abcam     | ab112    | Rb | P | Protein | O | O |
| TH                    | Abcam     | ab134461 | Ch | P | Protein | O | O |
| TH                    | Aves      | TYH      | Ch | P | Protein | O | O |
| TH                    | BioLegend | 818001   | Ms | M | Protein | O | O |
| Neurofilament markers |           |          |    |   |         |   |   |
| CNPase                | Aves      | CNP      | Ch | P | Protein | X | O |
| MAP2                  | Abcam     | ab32454  | Rb | P | Protein | O | O |
| MAP2                  | Abcam     | ab5392   | Ch | P | Protein | O | X |
| MAP2                  | Aves      | MAP      | Ch | P | Protein | O | O |
| MAP2                  | BioLegend | 822501   | Ch | P | Protein | O | X |
| MAP2                  | BioLegend | 801801   | Ms | M | Protein | O | O |
| MAP2                  | BioLegend | 840601   | Rb | P | Protein | O | O |
| MAP2                  | CST       | 8707     | Rb | M | Protein | O | O |
| MBP                   | Abcam     | ab134018 | Ch | P | Protein | O | O |
| MBP                   | Abcam     | ab7349   | Rt | M | Protein | O | O |
| MBP                   | Aves      | MBP      | Ch | P | Protein | O | O |
| MBP                   | BioLegend | 808401   | Ms | M | Protein | O | O |
| MBP                   | BioLegend | 836501   | Ms | M | Protein | O | O |
| MBP                   | CST       | 78896    | Rb | M | Protein | O | O |
| NF-H                  | Aves      | NFH      | Ch | P | Protein | O | O |
| NF-H                  | BioLegend | 835801   | Ms | M | Protein | O | O |
| NF-H                  | CST       | 2836     | Ms | M | Protein | O | O |
| NF-H NP               | BioLegend | 801701   | Ms | M | Protein | O | O |
| NF-H P                | BioLegend | 801601   | Ms | M | Protein | O | O |
| NF-H P                | BioLegend | 835501   | Ms | M | Protein | O | O |
| NF-H P                | BioLegend | 835701   | Ms | M | Protein | O | X |
| NF-H/NF-M HP          | BioLegend | 835602   | Ms | M | Protein | O | O |
| NF-H/NF-M HP          | BioLegend | 835604   | Ms | M | Protein | O | O |
| NF-H/NF-M P           | BioLegend | 837702   | Ms | M | Protein | O | X |
| NF-H/NF-M P           | BioLegend | 837704   | Ms | M | Protein | O | O |
| NF-M                  | Abcam     | ab64300  | Rb | P | Protein | O | O |
| NF-M                  | Aves      | NFM      | Ch | P | Protein | O | X |
| NF-M                  | CST       | 2838     | Ms | M | Protein | O | X |
| NF-L                  | Aves      | NFL      | Ch | P | Protein | O | O |
| NF-L                  | BioLegend | 845802   | Ms | M | Protein | O | O |
| NF-L                  | BioLegend | 846002   | Ms | M | Protein | O | O |

|                                       |           |         |    |   |          |   |   |
|---------------------------------------|-----------|---------|----|---|----------|---|---|
| NF-L                                  | CST       | 2837    | Rb | M | Protein  | O | O |
| NF pan-axon                           | BioLegend | 837904  | Ms | M | Protein  | O | O |
| NF pan-neuro                          | BioLegend | 837801  | Ms | M | Protein  | O | X |
| Pan-actin                             | CST       | 8456    | Rb | P | Protein  | O | O |
| PLP                                   | Aves      | PLP     | Ch | P | Protein  | O | O |
| SMI-312                               | BioLegend | 837902  | Ms | P | Protein  | O | O |
| SMI-32                                | BioLegend | 801704  | Ms | M | Protein  | O | O |
| Tubulin                               | Abcam     | ab6160  | Rt | M | Protein  | O | O |
| Tubulin                               | Abcam     | ab7291  | Ms | M | Protein  | O | O |
| Tubulin $\alpha$                      | CST       | 5063    | Rb | M | Protein  | O | O |
| Tubulin $\beta$                       | CST       | 7634    | Rb | M | Protein  | O | X |
| Tubulin $\beta$ 3                     | Aves      | TUJ     | Ch | P | Protein  | O | O |
| Tubulin $\beta$ 3                     | BioLegend | 801201  | Ms | M | Protein  | O | O |
| Tubulin $\beta$ 3                     | BioLegend | 801202  | Ms | M | Protein  | O | O |
| Tubulin $\beta$ 3                     | BioLegend | 802001  | Rb | P | Protein  | O | O |
| Tubulin $\beta$ 3                     | BioLegend | 845501  | Rb | M | Protein  | O | X |
| Neurotransmitters and neuromodulators |           |         |    |   |          |   |   |
| Neuropeptide Y                        | CST       | 11976   | Rb | M | Peptides | O | O |
| Synaptic proteins                     |           |         |    |   |          |   |   |
| Bassoon                               | Abcam     | ab82958 | Ms | M | Protein  | O | O |
| Bassoon                               | SYSY      | 141003  | Rb | P | Protein  | O | O |
| GABA <sub>B</sub> R1                  | Millipore | AB2256  | GP | P | Protein  | O | O |
| GluR1                                 | Abcam     | ab86141 | Rb | P | Protein  | X | O |
| GluR1                                 | BioLegend | 819801  | Ms | M | Protein  | O | X |
| GluR2/3                               | Millipore | AB1506  | Rb | P | Protein  | O | O |
| Homer1                                | SYSY      | 160003  | Rb | P | Protein  | O | O |
| mGluR1                                | Aves      | ER1     | Ch | P | Protein  | O | X |
| mGluR2                                | Aves      | ER2     | Ch | P | Protein  | O | X |
| mGluR5                                | Aves      | ER5     | Ch | P | Protein  | X | O |
| nAChR- $\alpha$ 7                     | BioLegend | 838401  | Rt | M | Protein  | X | O |
| Neuroigin-1                           | BioLegend | 819001  | Ms | M | Protein  | O | X |
| Neuroigin-3                           | BioLegend | 822001  | Ms | M | Protein  | O | X |
| PSD95                                 | BioLegend | 810401  | Ms | M | Protein  | X | O |
| PSD95                                 | CST       | 2507    | Rb | P | Protein  | X | O |
| PSD95                                 | CST       | 3450    | Rb | P | Protein  | O | O |
| PSD95                                 | CST       | 3409    | Rb | P | Protein  | X | O |

|                                  |          |          |    |   |         |   |   |
|----------------------------------|----------|----------|----|---|---------|---|---|
| PSD95                            | NeuroMab | 75-028   | Ms | M | Protein | O | O |
| Synapsin I                       | Abcam    | ab64581  | Rb | P | Protein | O | O |
| Synapsin I                       | CST      | 5297     | Rb | M | Protein | O | O |
| Synaptophysin                    | Abcam    | ab52636  | Rb | M | Protein | O | O |
| Synaptophysin                    | CST      | 5461     | Rb | M | Protein | O | O |
| Synaptotagmin                    | Aves     | STG      | Ch | P | Protein | O | O |
| SYNPR                            | Abcam    | ab175224 | Rb | M | Protein | O | O |
| VGluT1                           | Abcam    | ab104898 | Rb | P | Protein | O | O |
| VGluT1                           | CST      | 821301   | Ms | M | Protein | O | O |
| VGluT2                           | Abcam    | ab101760 | Gt | P | Protein | O | O |
| Nuclear and other markers        |          |          |    |   |         |   |   |
| E-Cadherin                       | BD       | 610181   | Ms | M | Protein | O | X |
| N-cadherin                       | BD       | 610920   | Ms | M | Protein | O | X |
| GAP                              | Aves     | GAP43    | Ch | P | Protein | O | X |
| GFP                              | Aves     | GFP-1020 | Ch | P | Protein | O | O |
| GFP                              | CST      | 2956     | Rb | M | Protein | O | O |
| GFP                              | LT       | A10262   | Ch | P | Protein | O | O |
| GFP, A594 <sup>e</sup>           | LT       | A21312   | Rb | P | Protein | O | O |
| GFP, A647 <sup>f</sup>           | LT       | A31852   | Rb | P | Protein | O | O |
| Lectin, D488 <sup>g</sup>        | Vector   | DL-1174  |    |   | Protein | O | O |
| Lectin, D594 <sup>h</sup>        | Vector   | DL-1177  |    |   | Protein | O | O |
| Histone H3,<br>A647 <sup>f</sup> | CST      | 12230    | Rb | M | Protein | O | O |
| DAPI                             | LT       | D1306    |    |   | DNA     | O | O |
| TOTO-1                           | LT       | T3600    |    |   | DNA     | O | O |

<sup>a</sup> CST, Cell Signaling Technology; SYSY, Synaptic Systems; LT, Life Technologies.

<sup>b</sup> Rb, rabbit; Ms, mouse; Gt, goat; Ch, chicken; Rt, rat; GP, guinea pig.

<sup>c</sup> M, monoclonal; P, polyclonal.

<sup>d</sup> A488, Alexa Fluor 488 conjugate.

<sup>e</sup> A594, Alexa Fluor 594 conjugate.

<sup>f</sup> A647, Alexa Fluor 647 conjugate.

<sup>g</sup> D488, DyLight 488 conjugate.

<sup>h</sup> D594, DyLight 594 conjugate.

**Supplementary Table 2. Comparison of technologies for intact tissue processing and imaging.**

|                              | <b>MAP</b>                            | <b>ExM</b>                  | <b>CLARITY</b>                        | <b>SWITCH</b>                         | <b>Scale</b>            |
|------------------------------|---------------------------------------|-----------------------------|---------------------------------------|---------------------------------------|-------------------------|
| Type                         | Polymer-tissue hybrid                 | Polymer-tissue hybrid       | Polymer-tissue hybrid                 | Multifunctional fixative-tissue-gel   | Tissue                  |
| Initiation system            | Thermal initiator                     | Persulfate / TEMED          | Thermal initiator                     | N/A                                   | N/A                     |
| Expansion rate               | 4-fold                                | 4-fold                      | <2-fold                               | <1.5-fold                             | <2-fold                 |
| Homogenization               | Protein denaturation and dissociation | Proteinase K digestion      | N/A                                   | N/A                                   | N/A                     |
| Protein preservation         | Yes                                   | No                          | Yes                                   | Yes                                   | Yes                     |
| Staining step                | After gel embedding and lipid removal | Before gel embedding        | After gel embedding and lipid removal | After gel formation and lipid removal | After lipid removal     |
| Applicable to whole organ    | Yes                                   | No                          | Yes                                   | Yes                                   | Yes                     |
| Protein labeling             | Conventional antibodies               | Custom trifunctional probes | Conventional antibodies               | Conventional antibodies               | Conventional antibodies |
| Multiround immunolabeling    | Yes                                   | No                          | Limited                               | Yes                                   | No                      |
| Requires antibody validation | Yes                                   | No                          | Yes                                   | Yes                                   | Yes                     |
